# Supplementary material for: A New Anti-Estrogen Discovery Platform Identifies FDA-Approved Imidazole Anti-Fungal Drugs as Bioactive Compounds against ERα Expressing Breast Cancer Cells
Source: Int J Mol Sci. 2021 Mar 13;22(6):2915. doi: 10.3390/ijms22062915 (PMC8000495; doi:10.3390/ijms22062915)
Supplement: Supplementary file 1 [file ijms-22-02915-s001.xlsx]

## Sheet: Supplementary Table 1
	Drugs displacing the fluorescent E2	Drugs displacing the fluorescent E2 not intended for cancer or endocrinological disease treatment.		FINAL List
1	Idarubicin	Acarbose	1	Acarbose
2	Fulvestrant	Altrenogest	2	Benserazide
3	Topotecan	Apomorphine	3	Benzbromarone
4	Doxorubicin	Benserazide	4	Candesartan cilexetil
5	2-Methoxyestradiol	Benzbromarone	5	Carbidopa
6	Epirubicin	Candesartan cilexetil	6	Clotrimazole
7	Acarbose	Carbidopa	7	Deoxyarbutin
8	Tigecycline	Clotrimazole	8	Dipyridamole
9	Genistein	Crystal violet	9	Econazole
10	Resveratrol	Curcumin	10	Entacapone
11	Ethinyl Estradiol	Daidzein	11	Fenticonazole
12	Pomalidomide	Deoxyarbutin	12	Isoconazole
13	Riluzole	Dipyridamole	13	Licofelone
14	Estrone	Dopamine	14	Lithocholic acid
15	Monobenzone	Doxycycline	15	Monobenzone
16	Tretinoin	Econazole	16	Moxifloxacin
17	Estradiol	Entacapone	17	Oxytetracycline
18	Oxytetracycline	Ethacridine	18	Riluzole
19	Diethylstilbestrol	Fenticonazole	19	Sulconazole
20	Verteporfin	Isoconazole	20	Tigecycline
21	Curcumin	L-Adrenaline	21	Tolcapone
22	Daidzein	Licofelone
23	Carbidopa	Lithocholic acid
24	Candesartan cilexetil	Monobenzone
25	Dipyridamole	Moxifloxacin
26	Crystal violet	Noradrenaline
27	Licofelone	norethindrone
28	Oxytetracycline	Ospemifene
29	Mestranol	Oxytetracycline
30	Eltrombopag	Ractopamine
31	Benserazide	Resveratrol
32	Estriol	Riluzole
33	Methacycline	Sulconazole
34	Dopamine	Tigecycline
35	Epinephrine	Tolcapone
36	Isoconazole
37	L-Adrenaline
38	Dehydroepiandrosterone	Yellow indicates manually excluded drugs
39	Noradrenaline
40	Daunorubicin
41	Entacapone
42	Estradiol valerate
43	Tolcapone
44	Altrenogest
45	Lithocholic acid
46	Estradiol Cypionate
47	Doxycycline
48	norethindrone
49	Sulconazole
50	Deoxyarbutin
51	Dydrogesterone
52	Tiratricol
53	Ethacridine
54	Moxifloxacin
55	Clotrimazole
56	Fenticonazole
57	Econazole
58	Ospemifene
59	Benzbromarone
60	Apomorphine
61	Ractopamine
